# Supplementary material for: Effect of Cellulose Nanocrystals on the Properties of Cement Paste
Source: Hindawi journal article supplement (doi:10.1155/2019/8318260), 2019-12-16
Supplement: f1 [file 8318260.f1.zip]

Archive with 23 entries (23 files):
- Fig 1.eps
- Fig 10.opj
- Fig 2.opj
- Fig 3 a.eps
- Fig 3 b.eps
- Fig 3 c.eps
- Fig 3 d.eps
- Fig 3 e.eps
- Fig 3 f.eps
- Fig 4 a.eps
- Fig 4 b.eps
- Fig 5 a.eps
- Fig 5 b.eps
- Fig 6 a.eps
- Fig 6 b.eps
- Fig 7 a.eps
- Fig 7 b.eps
- Fig 8 a.eps
- Fig 8 b.eps
- Fig 8 c.eps
- Fig 8 d.eps
- Fig 9 a.opj
- Fig 9 b.opj
